# Supplementary material for: Synthetic and Nanotechnological Approaches for a Diagnostic Use of Manganese
Source: MDPI journal article supplement (doi:10.3390/molecules27103124), 2022-05-13
Supplement: s1 [file s1]

Supplementary Materials

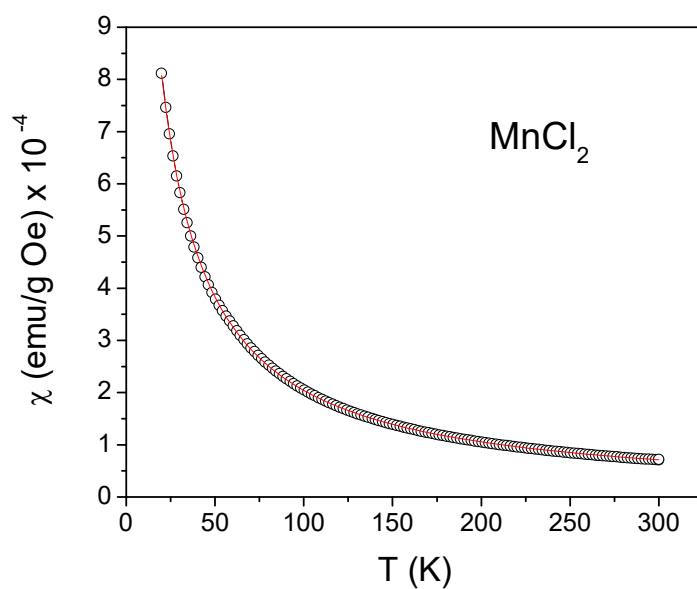

**Figure S1.** Curve of mass susceptibility ( $\chi$ ) as a function of temperature (T) measured on a sample of  $\text{MnCl}_2$ , in  $H_{\text{appl}} = 10$  kOe. The red line is the fitting curve to the Curie-Weiss law.
